# Supplementary material for: Palladium-catalyzed ring-opening reactions of cyclopropanated 7-oxabenzonorbornadiene with alcohols
Source: publisher site journal article supplement (doi:10.3762/bjoc.12.209), 2016-10-14
Supplement: Additional file 2 [file 1860-5397-12-209-S2.pdf]

## Supporting Information

for

### **Palladium-catalyzed ring-opening reactions of cyclopropanated 7-oxabenzonorbornadiene with alcohols**

Katrina Tait, Oday Alrifai, Rebecca Boutin, Jamie Haner and William Tam\*

Address: Guelph-Waterloo Centre for Graduate Work in Chemistry and Biochemistry,  
Department of Chemistry, University of Guelph, Guelph, Ontario, N1G 2W1, Canada

*Email: William Tam - [wtam@uoguelph.ca](mailto:wtam@uoguelph.ca)*

\*Corresponding author

### **NMR spectra**

#### **Table of Contents**

<sup>1</sup>H and <sup>13</sup>C NMR spectra for new compounds **11d**, **g-j**, **m**, **n** S2-S8

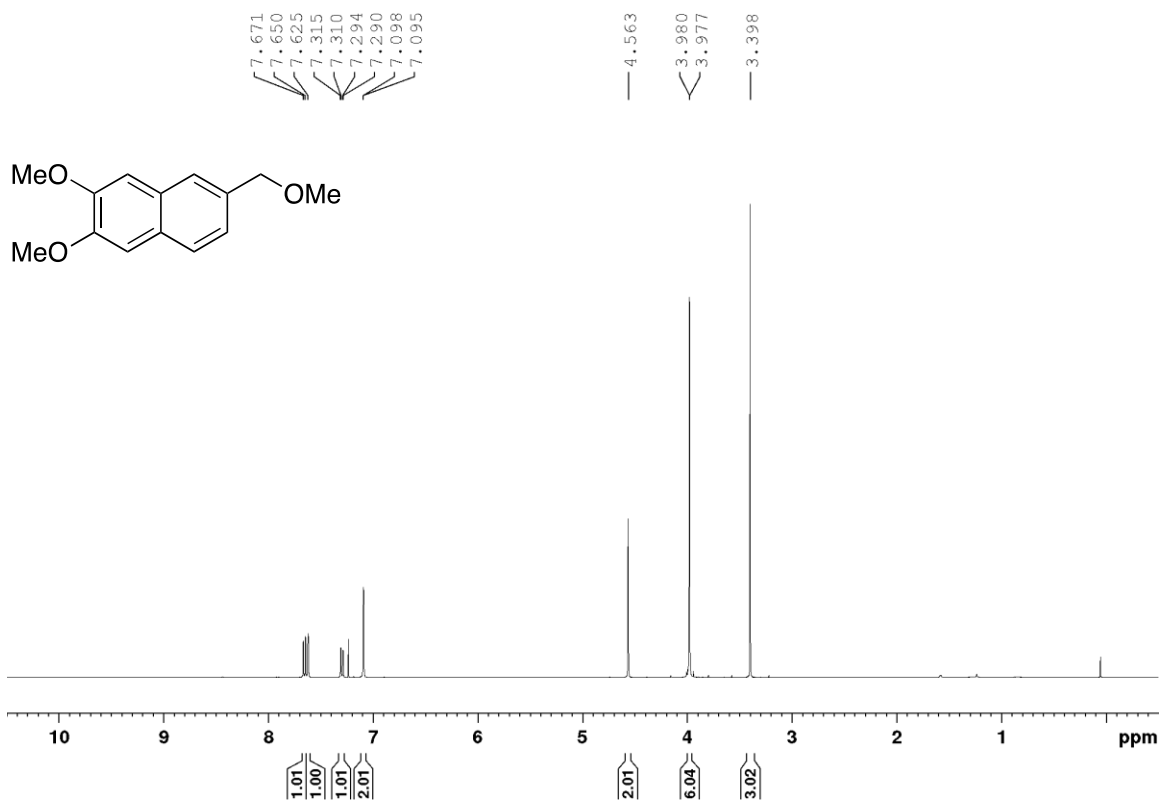

400 MHz <sup>1</sup>H NMR spectrum of **11d** in CDCl<sub>3</sub>

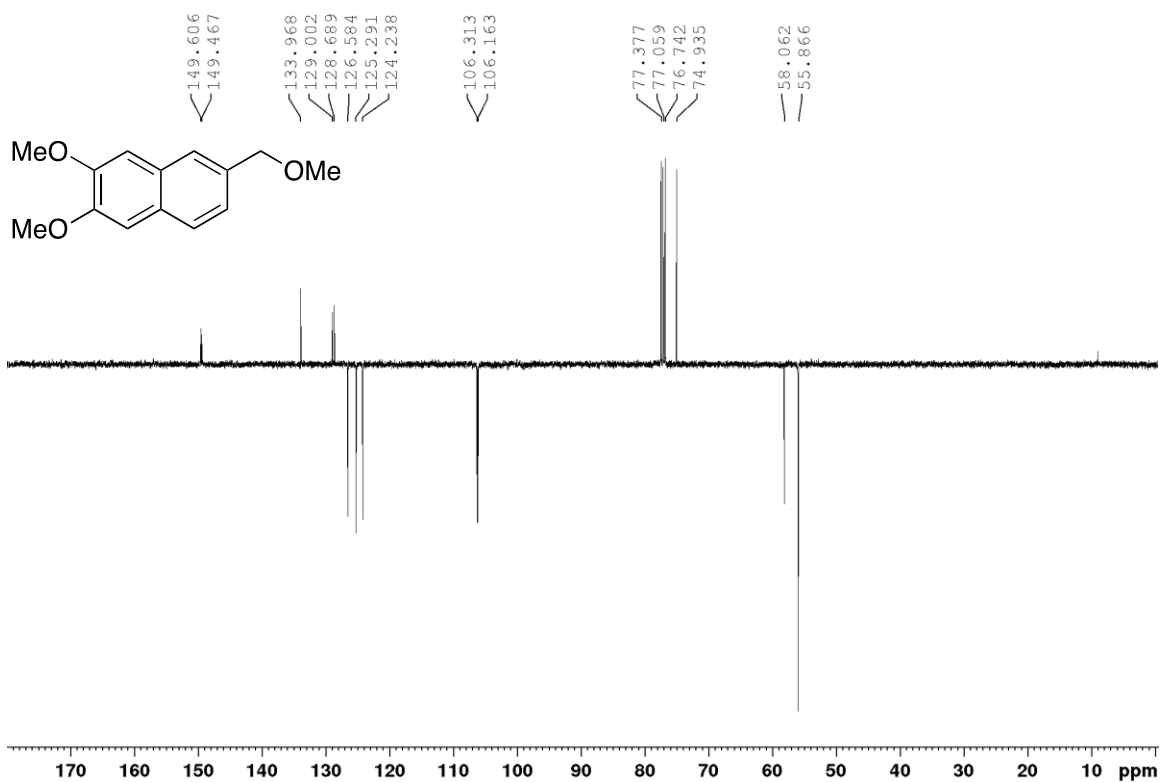

100 MHz <sup>13</sup>C NMR spectrum of **11d** in CDCl<sub>3</sub>

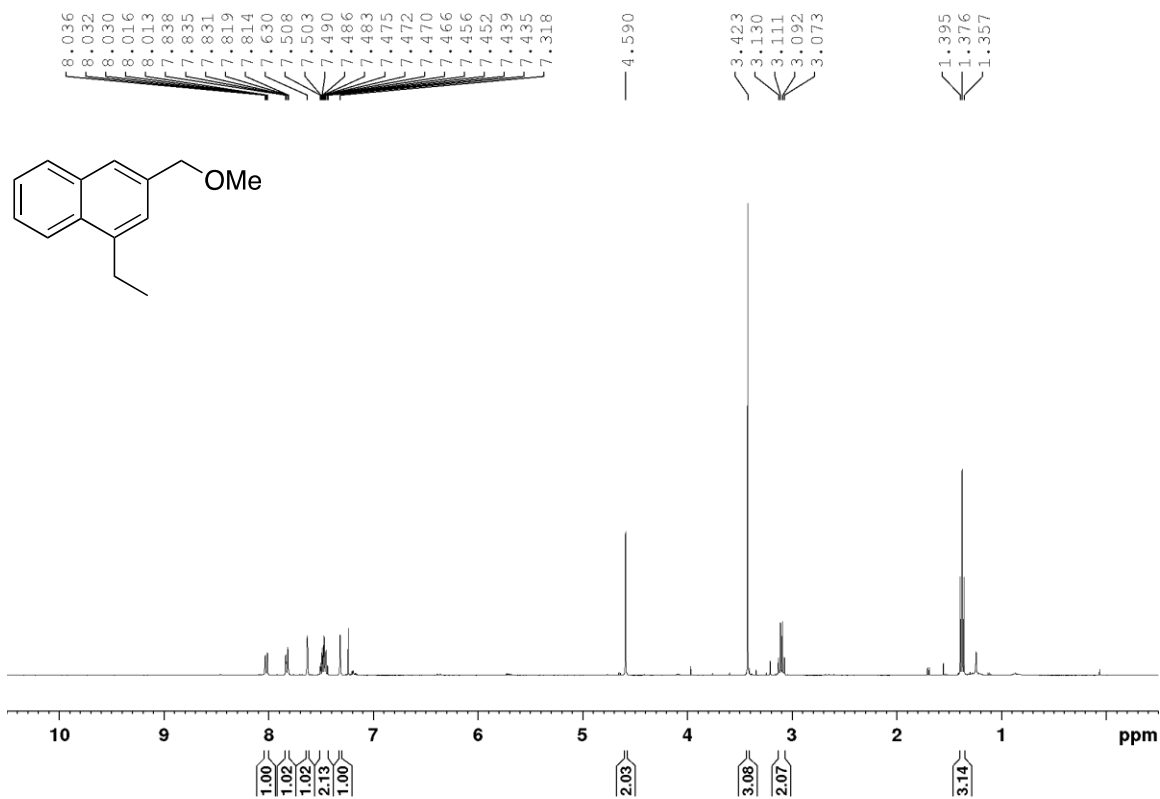

400 MHz  $^1\text{H}$  NMR spectrum of **11g** with  $\text{CDCl}_3$

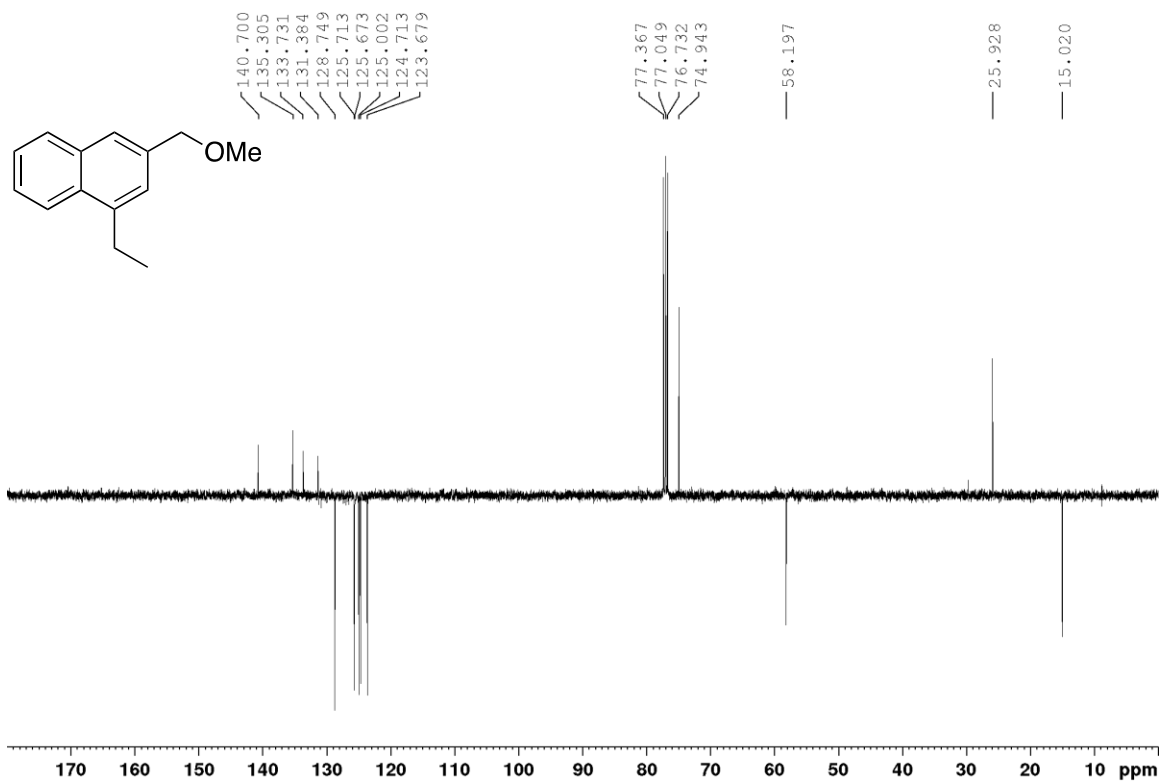

100 MHz  $^{13}\text{C}$  NMR spectrum of **11g** with  $\text{CDCl}_3$

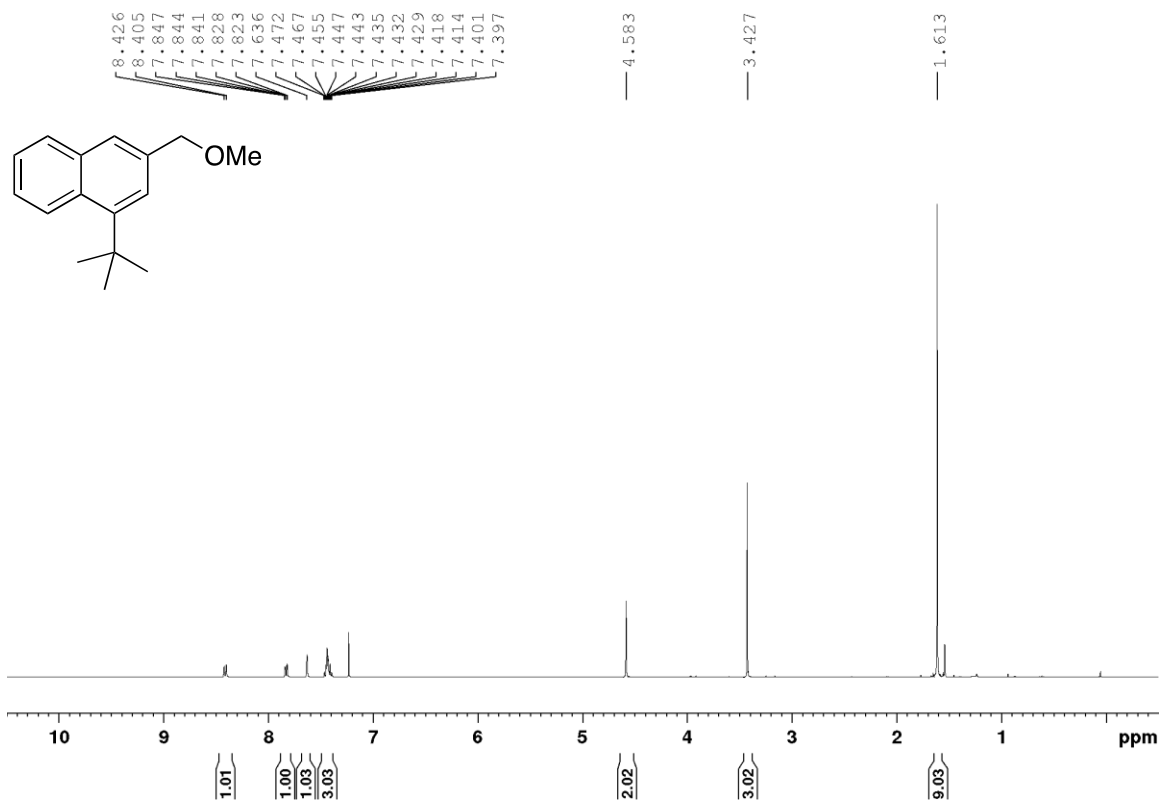

400 MHz <sup>1</sup>H NMR spectrum of **11h** in CDCl<sub>3</sub>

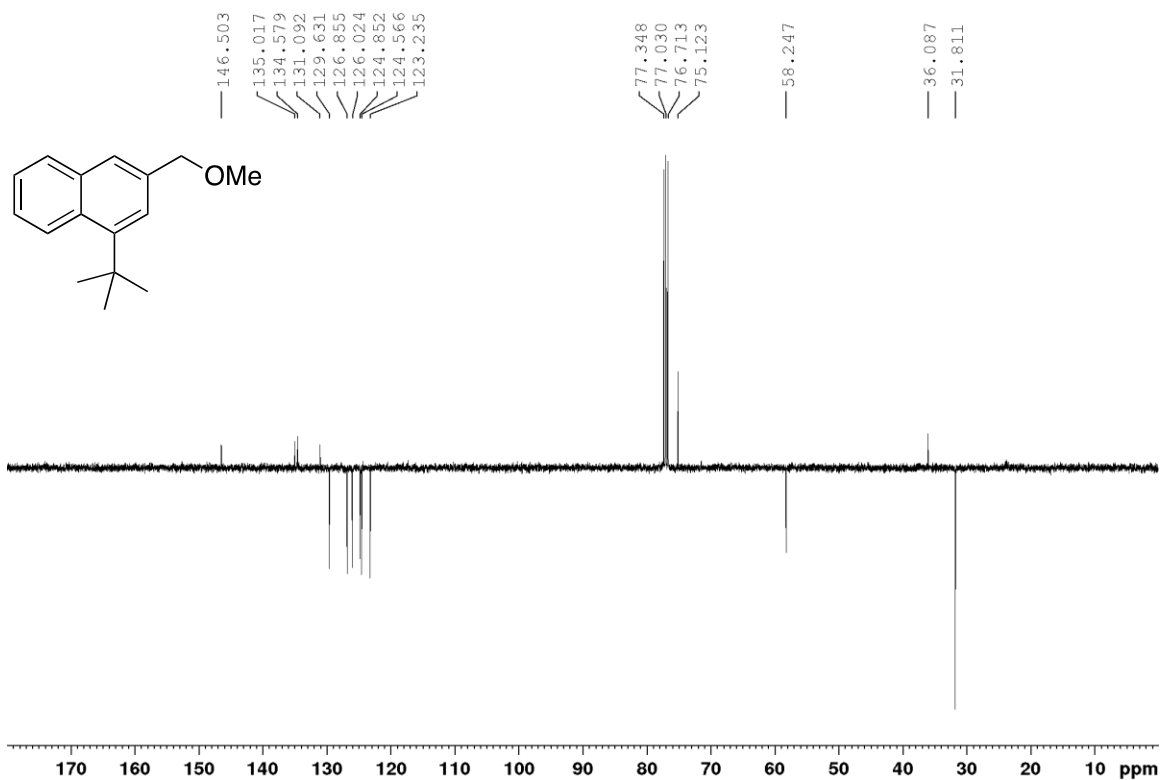

100 MHz <sup>13</sup>C NMR spectrum of **11h** in CDCl<sub>3</sub>

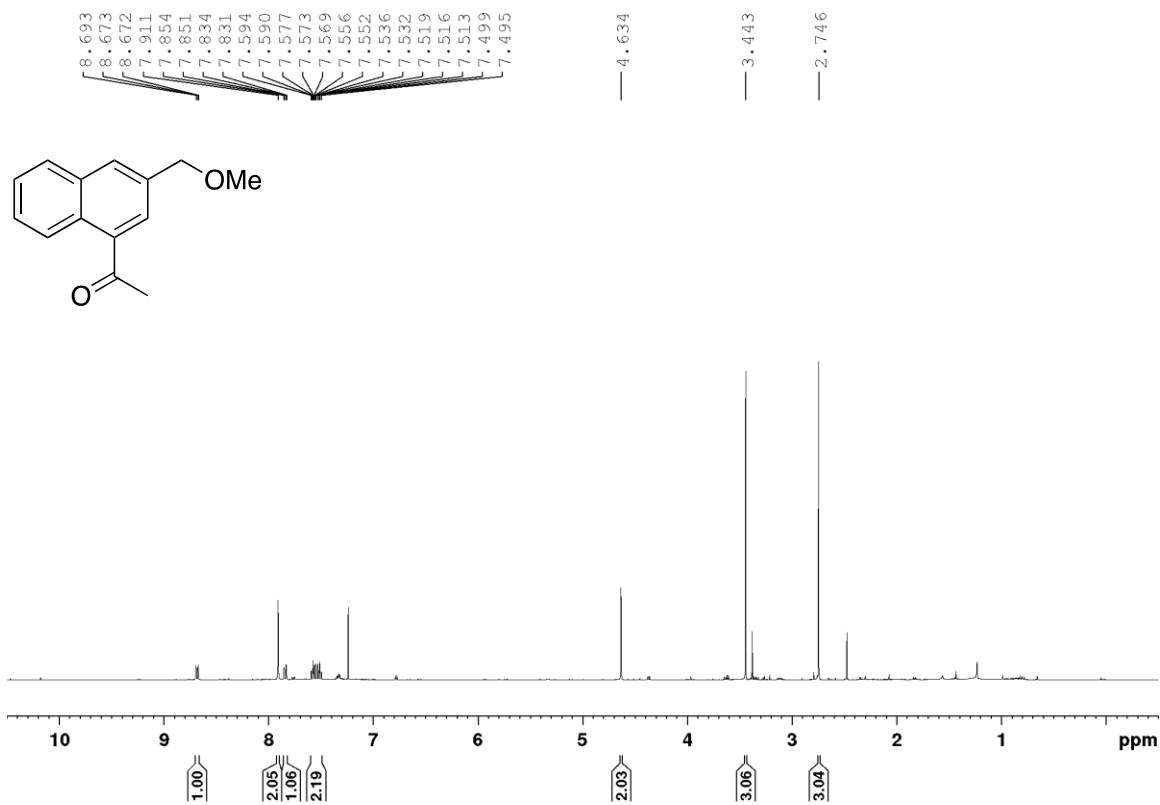

400 MHz <sup>1</sup>H NMR spectrum of **11i** in CDCl<sub>3</sub>

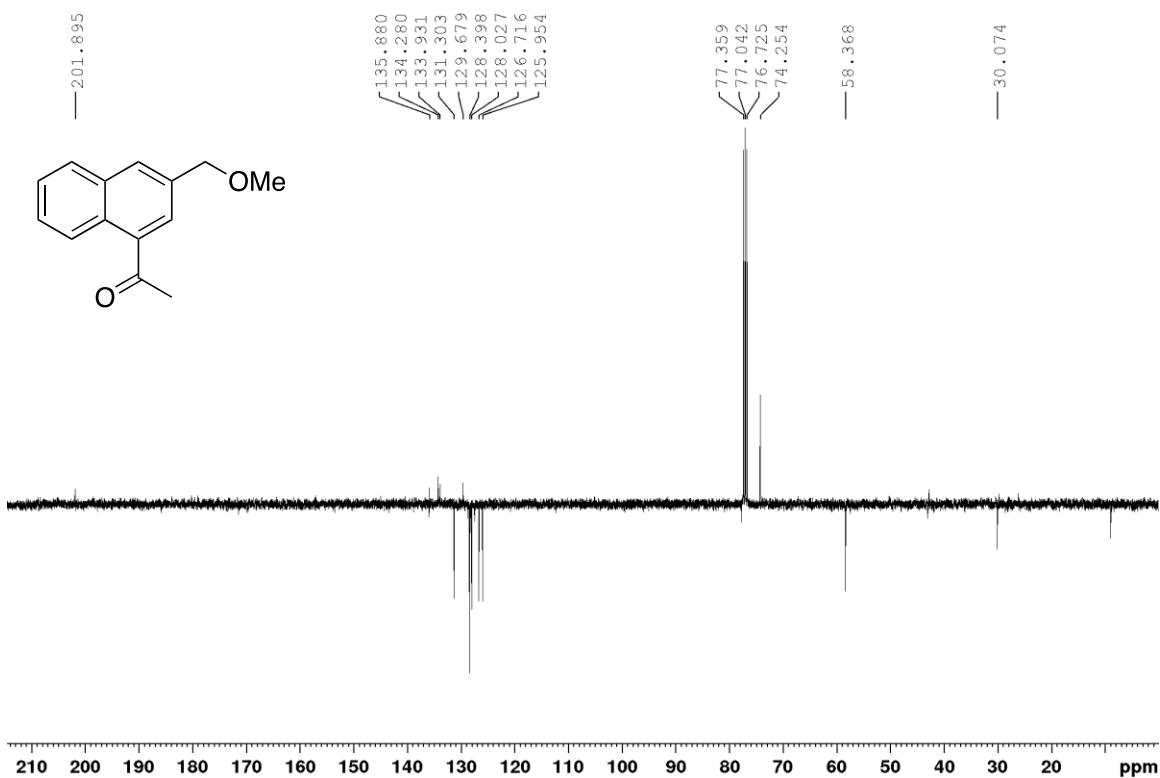

100 MHz <sup>13</sup>C NMR spectrum of **11i** in CDCl<sub>3</sub>

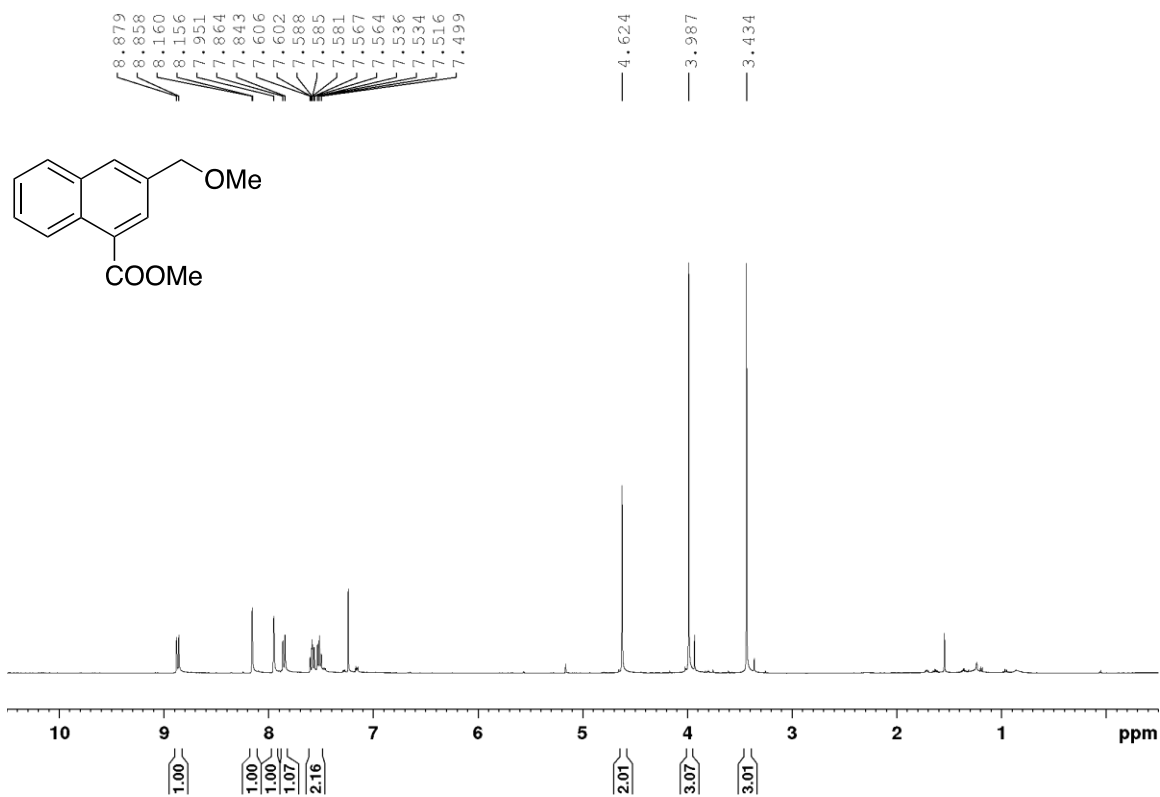

400 MHz <sup>1</sup>H NMR spectrum of **11j** in CDCl<sub>3</sub>

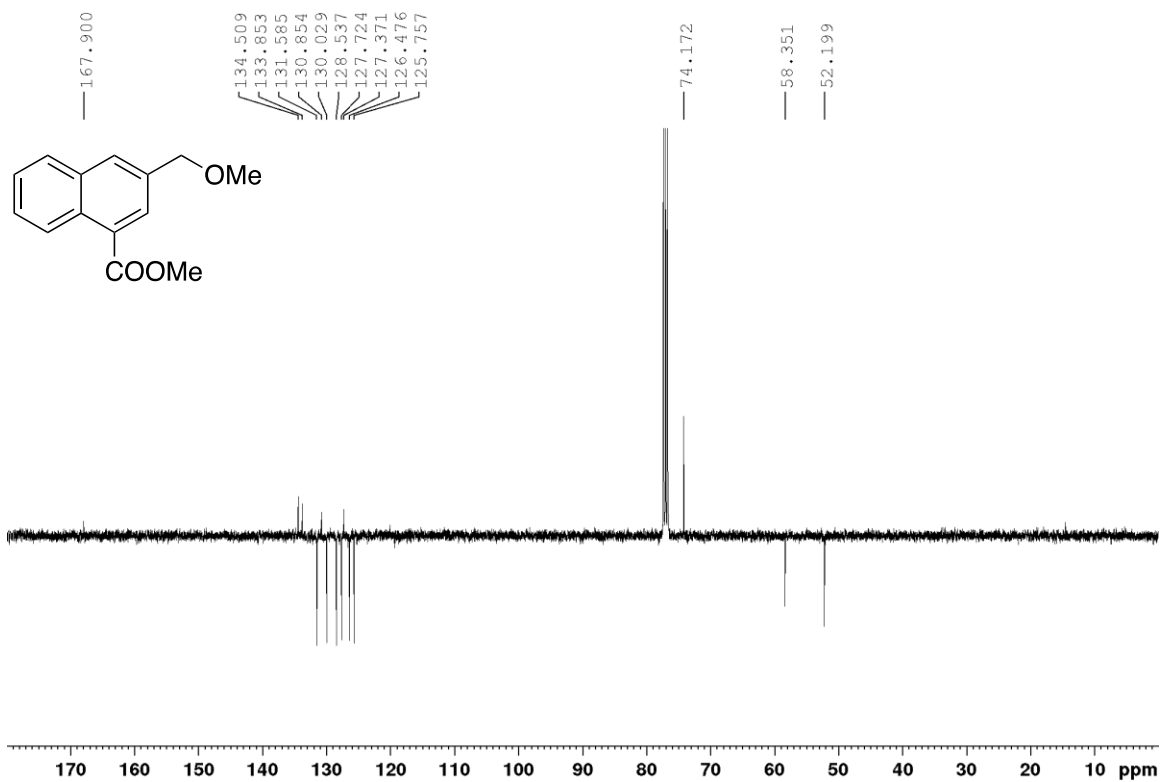

100 MHz <sup>13</sup>C NMR spectrum of **11j** in CDCl<sub>3</sub>

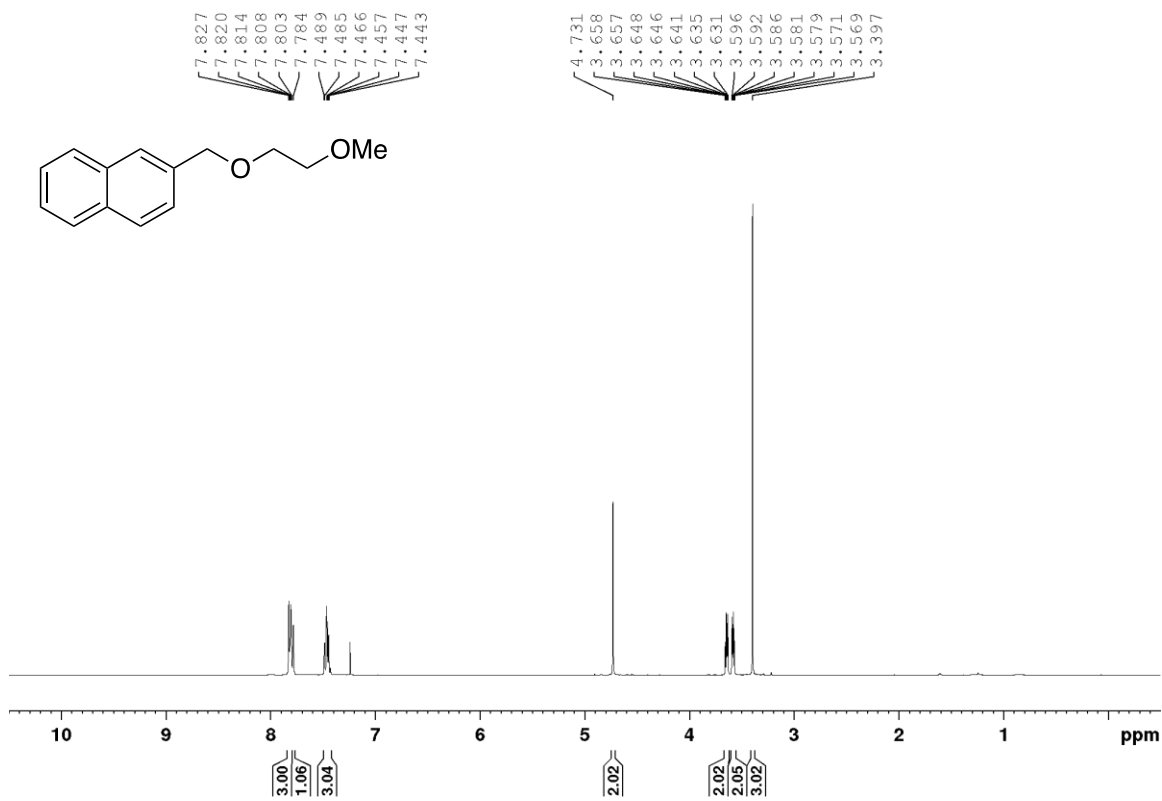

400 MHz <sup>1</sup>H spectrum of **11m** in CDCl<sub>3</sub>

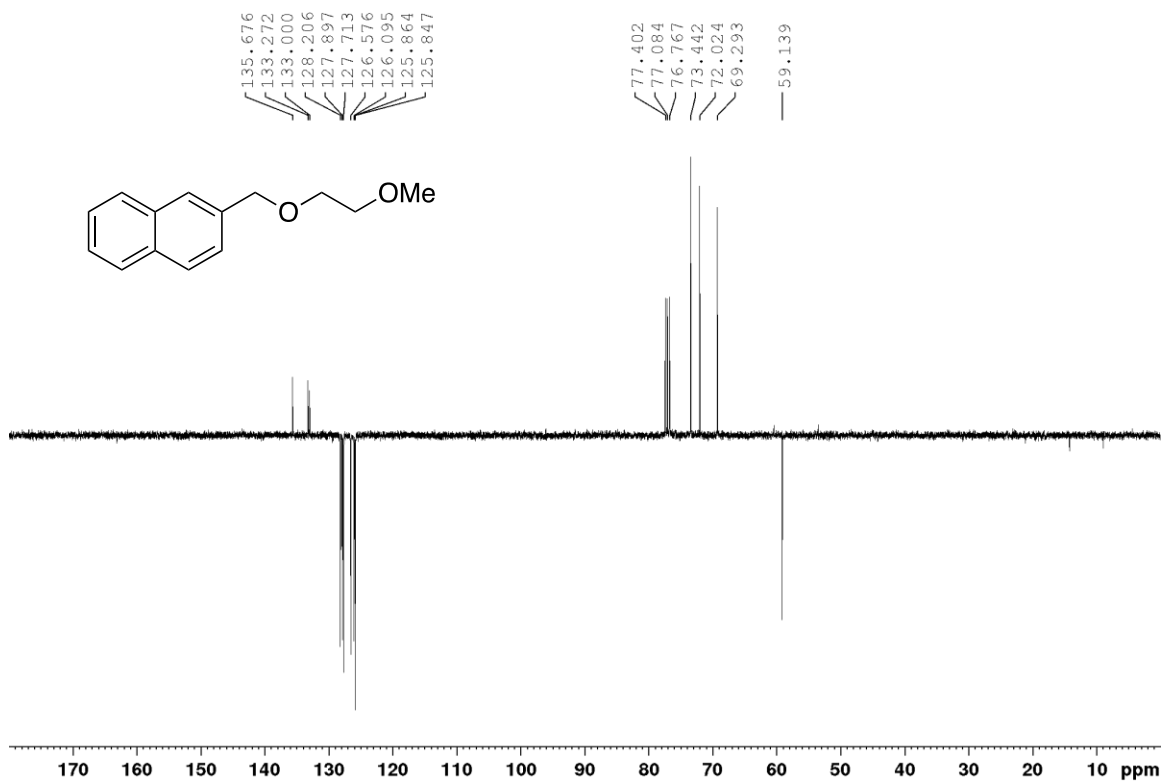

100 MHz <sup>13</sup>C NMR spectrum of **11m** in CDCl<sub>3</sub>

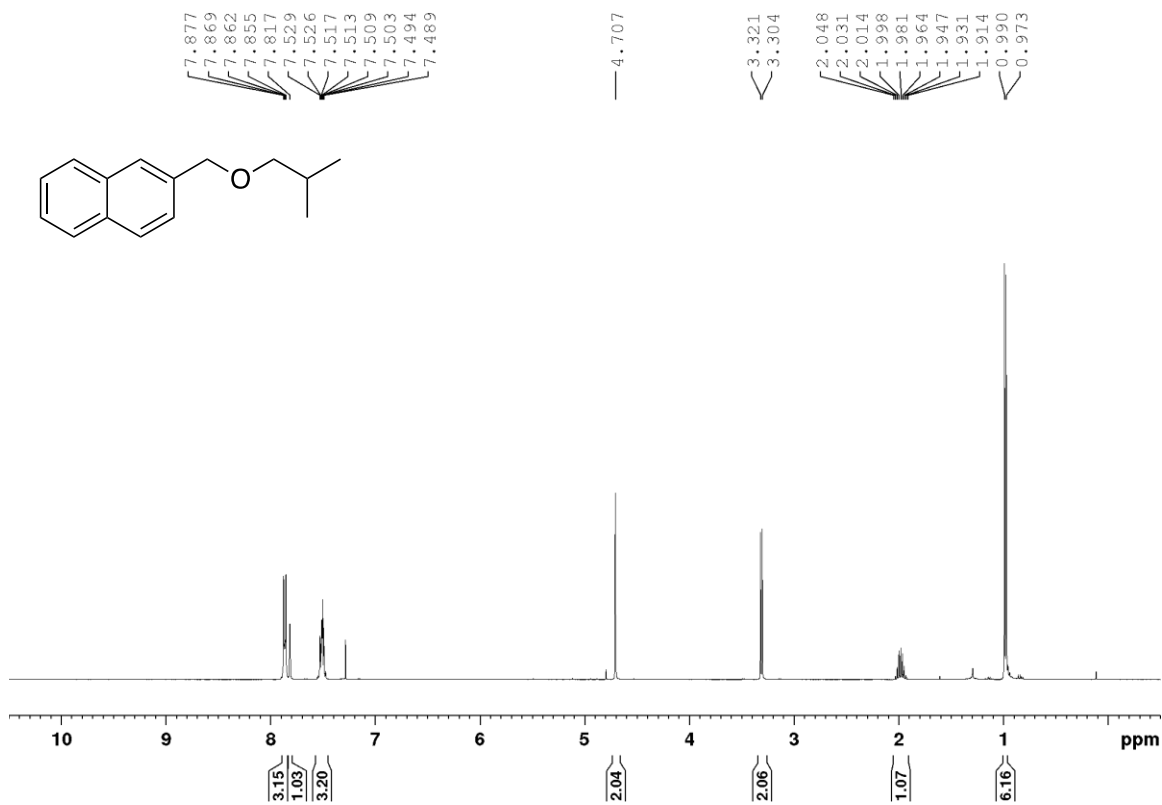

400 MHz  $^1\text{H}$  NMR spectrum of **11n** in  $\text{CDCl}_3$

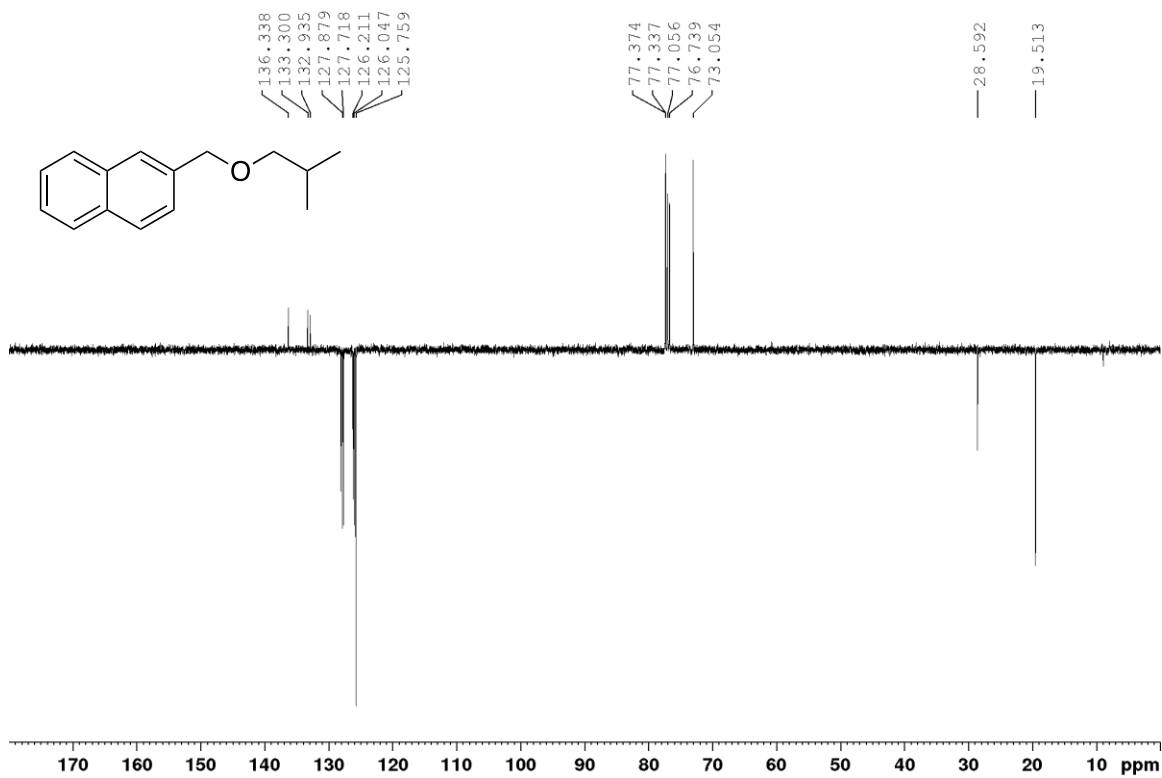

100 MHz  $^{13}\text{C}$  NMR spectrum of **11n** in  $\text{CDCl}_3$
